# Supplementary material
Source: ML conference proceedings conference paper supplement (https://openaccess.thecvf.com/content/CVPR2022/html/Kwon_Context-Aware_Sequence_Alignment_CVPR_2022_paper.html)
Supplement: Supplementary file 2 [file Kwon_Context-Aware_Sequence_Alignment_CVPR_2022_supplemental.zip]

Archive with 2 entries (2 files):
- CASA_SUPP_CVPR2022.pdf
- CASA_SUPP_VIDEO.mp4
